# Supplementary material for: A predictive index for health status using species-level gut microbiome profiling
Source: PubMed Central journal article supplement (PMC7492273; doi:10.1038/s41467-020-18476-8), 2020-09-15
Supplement: 41467_2020_18476_MOESM7_ESM.pdf [file 41467_2020_18476_MOESM7_ESM.pdf]

**Title:** Supplementary Data 1

**Description:** Studies and samples used to construct a meta-dataset composed of 4,347 human stool metagenomes.

**Title:** Supplementary Data 2

**Description:** Taxonomic information of the 313 microbial species found to be present across 4,347 stool metagenomes.

**Title:** Supplementary Data 3

**Description:** Evidence from recent studies reporting associations between Health-prevalent/- scarce species and human health/disease.

**Title:** Supplementary Data 4

**Description:** Studies and samples used to construct the independent validation set composed of 679 human stool metagenomes
